# Supplementary material for: Dual photorecording on cholesteric azobenzene-containing LC polymer films using helix pitch phototuning and holographic grating recording
Source: Royal Society of Chemistry journal article supplement (doi:10.1039/c2jm16591k), 2012-01-01
Supplement: c2jm16591k.pdf [file c2jm16591k.pdf]

## SUPPORTING INFORMATION

# **Dual photorecording on cholesteric azobenzene-containing LC polymer films using helix pitch photo-tuning and holographic grating recording**

Alexander Ryabchun<sup>1\*</sup>, Alexey Bobrovsky<sup>1</sup>, Anna Sobolewska<sup>2,3</sup>, Valery Shibaev<sup>1</sup>,  
Joachim Stumpe<sup>2</sup>

<sup>1</sup> Faculty of Chemistry, Moscow State University, Lenin Hills 1, Moscow, 119991 Russia

<sup>2</sup> Fraunhofer Institute for Applied Polymer Research, Geiselbergstr. 69, 14476 Potsdam, Germany

<sup>3</sup> Institute of Physical and Theoretical Chemistry, Wrocław University of Technology, Wybrzeże Wyspiańskiego 27, 50-370 Wrocław, Poland

---

\* ryabchunmsu@gmail.com

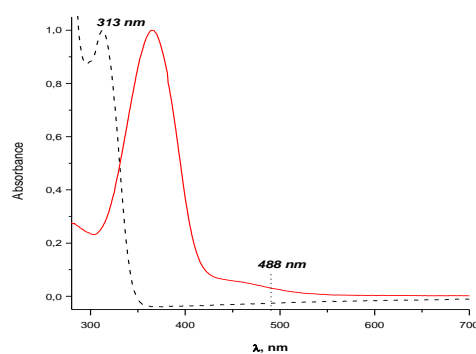

**Fig. S1.** Absorbance spectra of chiral-photochromic dopant **Sorb** (dashed line) and azobenzene fragment of copolymer **PAAzo8** (full line) in dichloromethane solution.

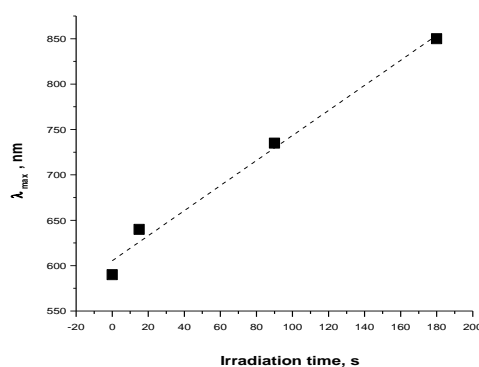

**Fig. S2.** Changes of the selective light reflection wavelength ( $\lambda_{max}$ ) results from different irradiation time with UV light (313 nm, light intensity  $\sim 1.2 \text{ mW/cm}^2$ ).

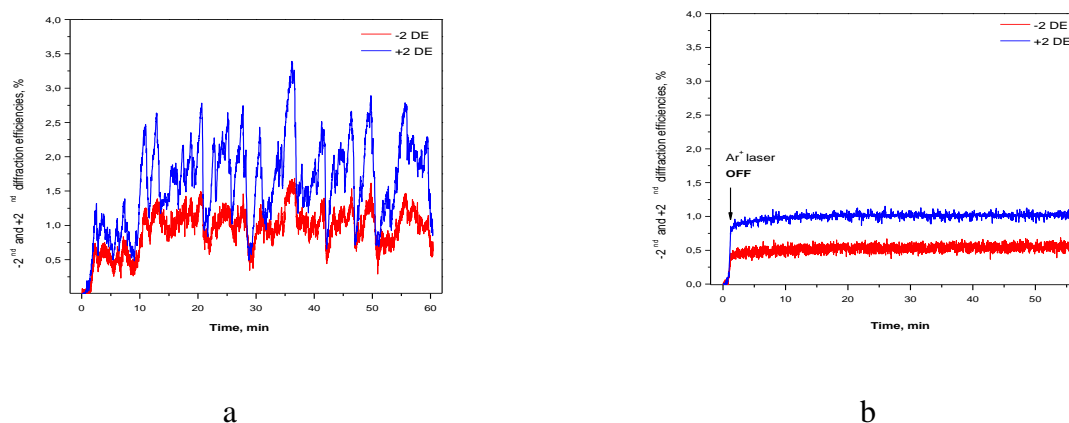

**Fig. S3.** The second-order diffraction efficiency changes during the grating recording process for different recording time: 1 hour (a) and 1 minute (b). In the last case the grating was recorded for a 1 minute till approximately maximum of 1<sup>st</sup> order diffraction efficiency, after that the  $\text{Ar}^+$  laser was off and the system was still monitored by He-Ne laser.

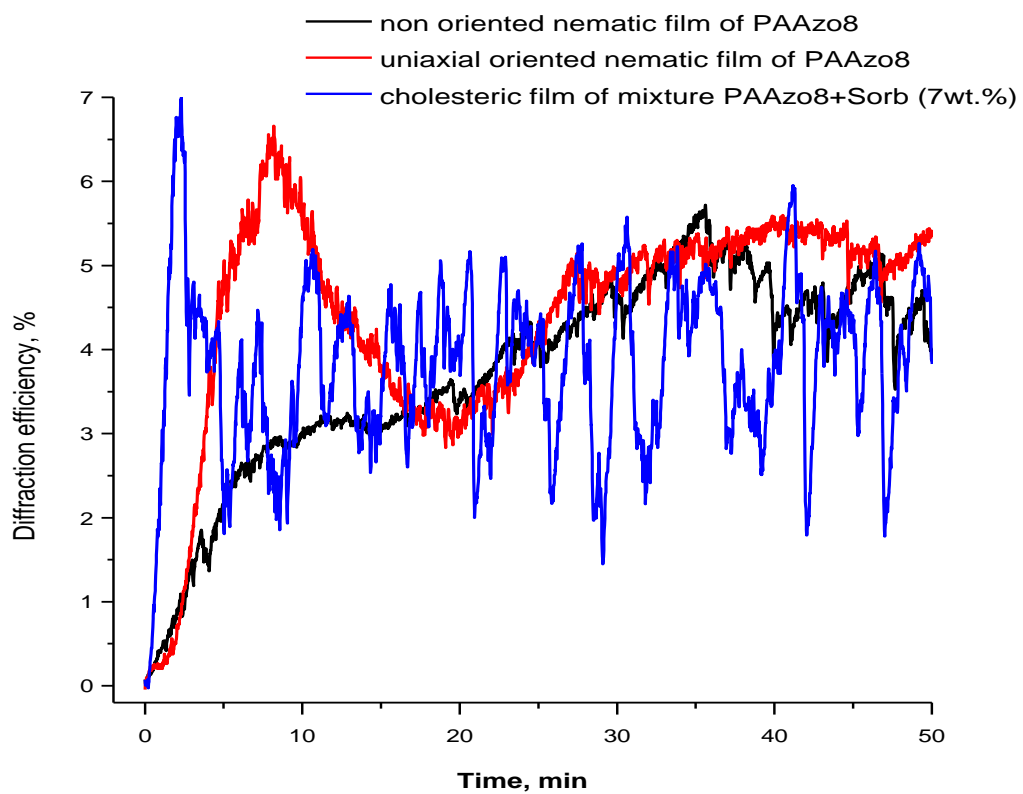

**Fig. S4.** First-order diffraction efficiency dynamics of uniaxial oriented and non-oriented nematic film of copolymer *PAAzo8*, and of cholesteric mixture *PAAzo8+Sorb* (7 wt. %).
